# Supplementary material
Source: PubMed Central journal article supplement (PMC3320918)
Supplement: supp_M111.287102_jbc.M111.287102-2.pdf [file supp_M111.287102_jbc.M111.287102-2.pdf]

**A.**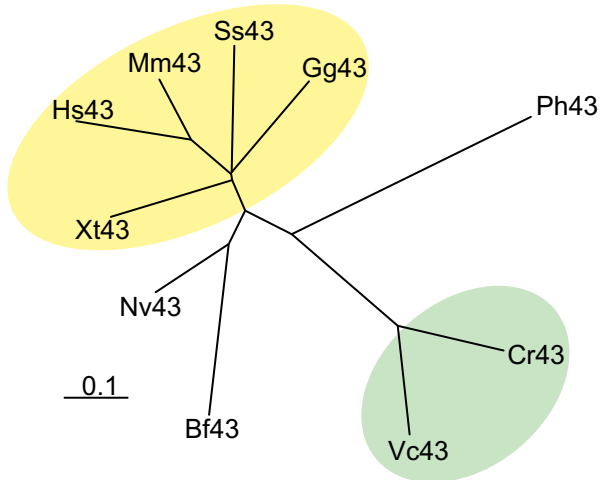**B.**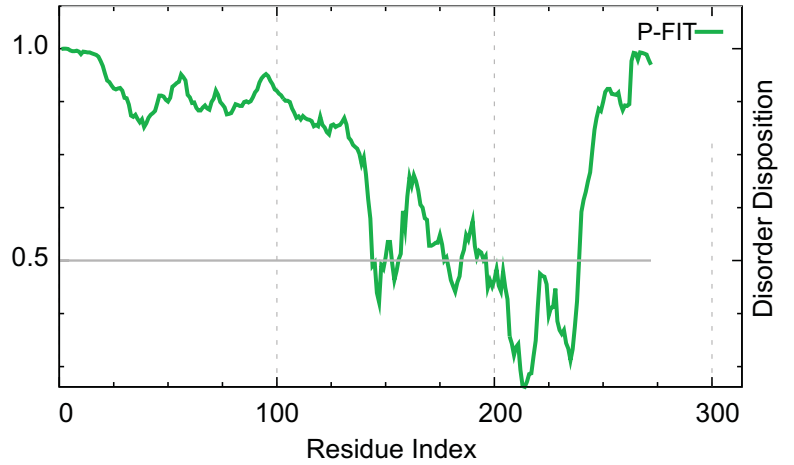**C.**

|                                    |                                                                            |     |
|------------------------------------|----------------------------------------------------------------------------|-----|
| Cr43                               | MDDDAPKAAPKAGRRAARTANTWGDSDSAAPEEPQKGGFGLD SG --- FGGGGGS PRGNAFGAEDSAPPKH | 66  |
| Vc43                               | DDDGRRAPKAGRRAARNANSWGDSTSPPEVHKGGFGLDVG --- FGEGLSTAHPSQQGGCNDSDASR       | 66  |
| Gg43                               | MEAE-RERAEG --- PRRPGVPRMGRRARQDVFSGESLS ---                               | 34  |
| Ss43                               | MDDN-LQLGDS --- GVVKNVAKLGRRARLAAEQTSLSLEES --- RH                         | 38  |
| Hs43                               | MEDL-LDLDEELRYSLATSRAKMGRRAQQESAQAENHLN ---                                | 38  |
| Mm43                               | MDDL-LDLGEERRRSSATSAGAKMGRRAHQESTQAENYLN ---                               | 38  |
| Xt43                               | MEDV-LDLGEA --- PSRRSGVKMGRRARASQENQQE ---                                 | 32  |
| Bf43                               | MDGEELDWTTE --- NKPREVRTGRRARAAFAFTLEDSAGGIDDDDIGNDIGGGSSVRDIHASWIMPHSF    | 66  |
| Ph43                               | MDFKLKRKSSS --- KRFMKGGLSFFLSPRDSS ---                                     | 29  |
| * :                                |                                                                            |     |
| Cr43                               | VASTNFAPSGDDEPAPAPSRQRTGDASGDRPS-RGGAPPSRPPPAEILGEDSKKFVGVSRRKQEQQLARGD    | 135 |
| Vc43                               | PGPIPPPPS --- DEDACVPSRGRTEVSGERLSGORTNAPS KPAPTELLGEDSKKFVGLSRRKQEQQLARGD | 134 |
| Gg43                               | -RKNSSSASTGEEPPPKPPR-RGGWAVDPVLAPTKSGKK --- HAAEVED --- HRLRQOSQE ---      | 88  |
| Ss43                               | VRKSSSSTSMGEVPPPKPAR-RGGWAEETSGS-AKSGRRPA --- VVEDVED --- RRLRPOTPO ---    | 94  |
| Hs43                               | -GKNSSLTLTGETSSAKLPRCROGGWAGDSVKA-SNGTOT --- GKQQLDLNACYHKTHHRNLGL ---     | 97  |
| Mm43                               | -SKNSSLTQTGEAPPPKPPR-RGGWADDSMKM-AKLGKK --- VSEEMED --- HRLRQONL ---       | 90  |
| Xt43                               | -TADARNQPGREGPPKPLR --- QGGWADDSGP-SKSTKR --- MTEDEVED --- SRLKQOSLD ---   | 84  |
| Bf43                               | IGSYDNARRDQSPGPPRPSR-RGGWADDTGKE --- KK --- SARLRSDSPPR ---                | 111 |
| Ph43                               | --KESNVGASGSHTDLMFSRKKISEWNIENVKP --- DNKSDTIEDN ---                       | 69  |
| * :                                |                                                                            |     |
| Cr43                               | DEVSRKNLKYETLITAGVDGIMEIPELEEEGREDLSNIVAEAPKVRTNKVQGMEELED-MHYKLPAMDDR     | 204 |
| Vc43                               | DDVSRKNLKYEALITAGFDGIMDIPELEDEGREDLSNVVAAAPKIRTNKVQGMEELED-MHFKLPAMDDR     | 203 |
| Gg43                               | ---VSSEGGDIPVIPDLEEVQEEEDLAMQVAAPPSVQVNRVLTYPHDLDKDLMKYAAFOTLDG            | 146 |
| Ss43                               | ---GSDDEGDIPVIPDLEEVQEEEDLTMQVAAPPSIQVNRVMTYRDLNDLDMKYSAFOTLDG             | 152 |
| Hs43                               | ---ASLEADIPVIPDLEEVQEEEDFVLQVAAPPSIQIKRVMTYRDLNDLDMKYSAIOTLDG              | 155 |
| Mm43                               | ---MGSDDDDIPVIPDLEEVQEEEDFVLQVASPPSIQVNRVMTYRDLNDLDMKYSAFOTLDG             | 148 |
| Xt43                               | ---ESDEGEDIPVIPDLEEVQEEEDLALQVASPPSVQVNRVLTYPKDLNDLMRHAAFOTLDG             | 142 |
| Bf43                               | ---RDSDEDIPVIPDLDVQEEEDMATQIAAPPSLQVNKIATYRELDLDFKQAAFLLD                  | 169 |
| Ph43                               | ---KKDYIDDIPVIPSIDDLCDGLTYEIAKAPLVGVKNIATYKDLNDILQHSAFANFE ---             | 126 |
| * ** : : : : : * * : : : * * : : : |                                                                            |     |
| Cr43                               | DIDLKLLTKVLAPEHELVREDDVGVWDHLLFTEVSSELLTEWDVQGE --- REDHLSVP ---           | 272 |
| Vc43                               | DIDLKLLTKVLAPEHELVREDDVGVWDHLLFTEVSSELLTEWDVQGE --- DGASGEETSFGKEDIVK ---  | 267 |
| Gg43                               | FVDLKLLTKVLAPEHELVREDDVGVWDHLLFTEVSSELLTEWDVQGE --- REDHLSVP ---           | 201 |
| Ss43                               | EIDLKLLTKVLAPEHELVREDDVGVWDHLLFTEVSSELLTEWDVQGE --- EQVPLPVL ---           | 207 |
| Hs43                               | EIDLKLLTKVLAPEHELVREDDVGVWDHLLFTEVSSELLTEWDVQGE --- KEDPAGQARHT ---        | 213 |
| Mm43                               | EIDLKLLTKVLAPEHELVREDDVGVWDHLLFTEVSSELLTEWDVQGE --- KEDPVGPSRYI ---        | 206 |
| Xt43                               | DIDLKLLTKVLAPEHELVREDDVGVWDHLLFTEVSSELLTEWDVQGE --- KEDMLKPSPLVS ---       | 201 |
| Bf43                               | EIDLKPLAKCLSAETDVLQEDKPDWDRFLFTEVTSELQVEWEAERPK --- EDEPLPMQG ---          | 226 |
| Ph43                               | EVNFRLLIKLLHPEEYLNPEPDVAWTRDGLLYELFSKINGRKLSD ---                          | 170 |
