# Supplementary material
Source: PubMed Central journal article supplement (PMC3320918)
Supplement: supp_M111.287102_jbc.M111.287102-4.pdf [file supp_M111.287102_jbc.M111.287102-4.pdf]

**Supplemental Table S1 – IFT A Antibodies Generated for this Study**

| <u>IFT A Subunit</u> | <u>Recombinant Antigen</u> | <u>Recombinant Affinity Tag</u> | <u>Host/Source</u>        |
|----------------------|----------------------------|---------------------------------|---------------------------|
| IFT43                | aa 1-272 (full length)     | N-terminal His <sub>6</sub> tag | Rabbit (Sigma-Genosys)    |
| IFT121               | aa 1002-1224 (C-terminus)  | N-terminal His <sub>6</sub> tag | Chicken (Aves Labs)       |
| IFT122               | aa 1056-1239 (C-terminus)  | N-terminal MBP tag              | Rabbit (Sigma-Genosys)    |
| IFT140               | aa 1182-1384 (C-terminus)  | N-terminal MBP tag              | Rabbit (Sigma-Genosys)    |
| IFT144               | aa 137-455 (N-terminal)    | N-terminal His <sub>6</sub> tag | Rat (University of Idaho) |
| IFT144               | aa 1090-1428 (C-terminal)  | N-terminal His <sub>6</sub> tag | Rat (University of Idaho) |

The monoclonal anti-IFT139 antibody, 139.1, was described previously (20)
