# Supplementary material
Source: PubMed Central journal article supplement (PMC3320918)

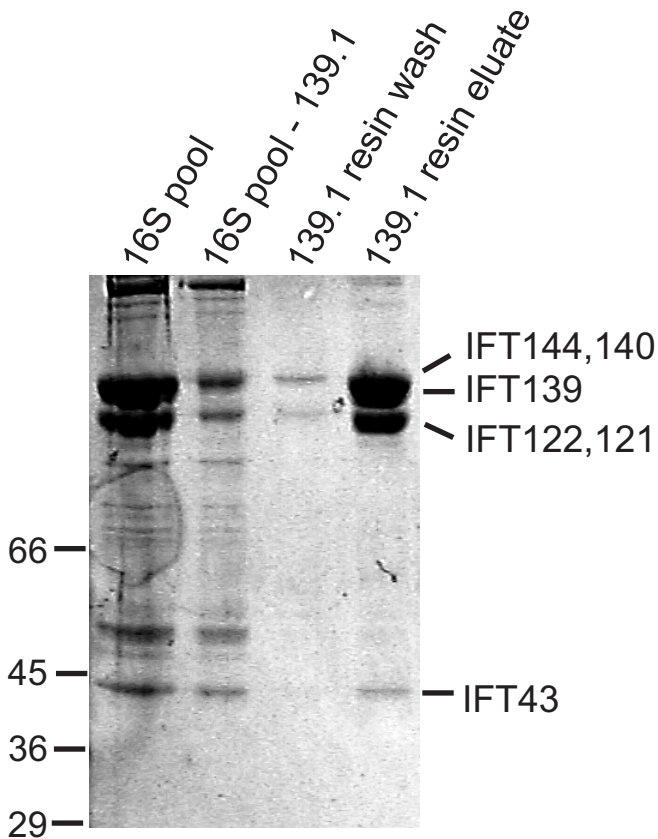

Figure S1. Behal et al.

Supplement: supp_M111.287102_jbc.M111.287102-1.pdf [file supp_M111.287102_jbc.M111.287102-1.pdf]

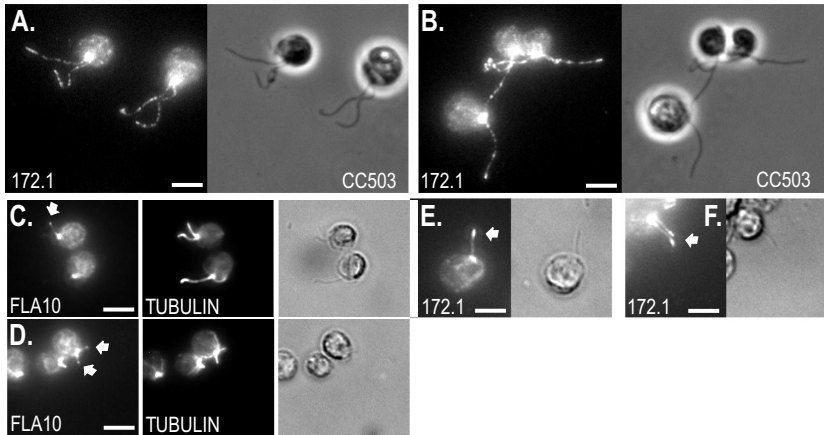

Supplemental Fig. S3  
Behal et al.

Supplement: supp_M111.287102_jbc.M111.287102-3.pdf [file supp_M111.287102_jbc.M111.287102-3.pdf]
